# Supplementary material for: Synthesis of micro-mesoporous materials ZSM-5/FDU-12 and the performance of dibenzothiophene hydrodesulfurization
Source: Royal Society of Chemistry journal article supplement (doi:10.1039/c7ra03679e), 2017-01-01
Supplement: c7ra03679e1.pdf [file c7ra03679e1.pdf]

## Supporting

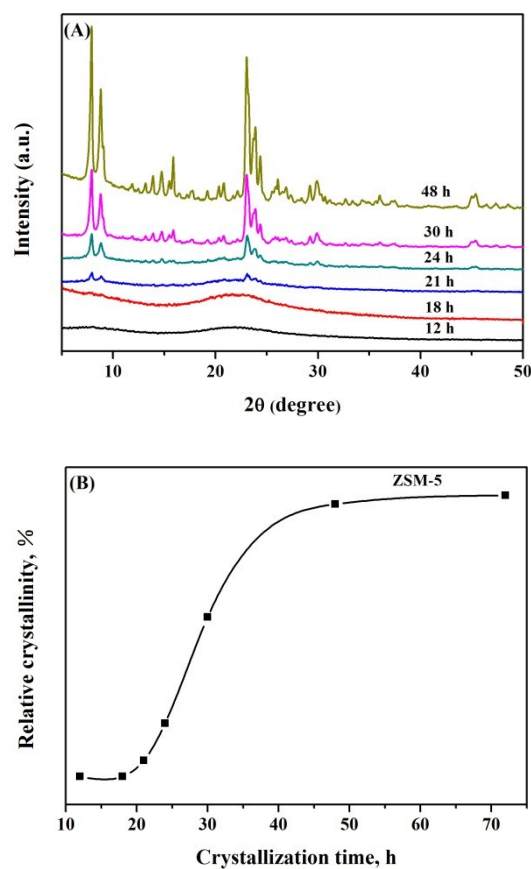

Fig. S1. The wide angle XRD patterns (A) and the relative crystallinity (B) of ZSM-5.

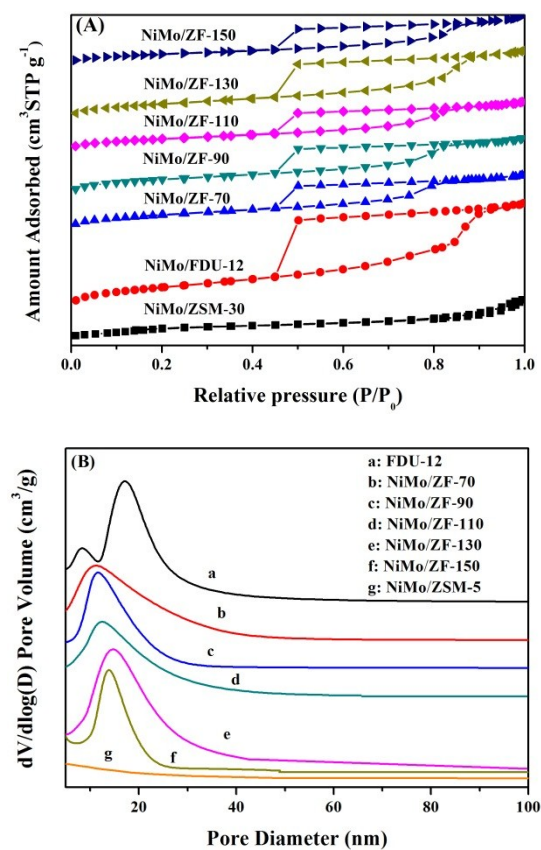

Fig. S2.  $N_2$  adsorption-desorption patterns (A) and pore size distributions (B) of different catalysts.

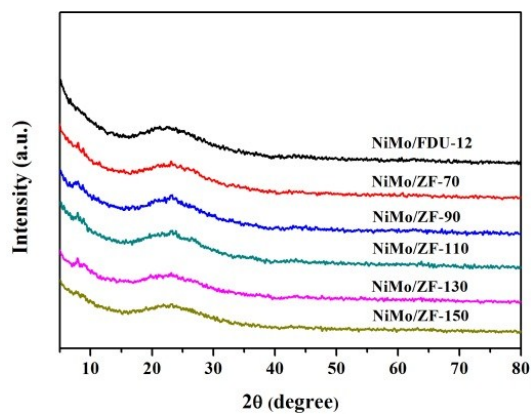

Fig. S3. XRD patterns of NiMo supported catalysts at wide angle region.

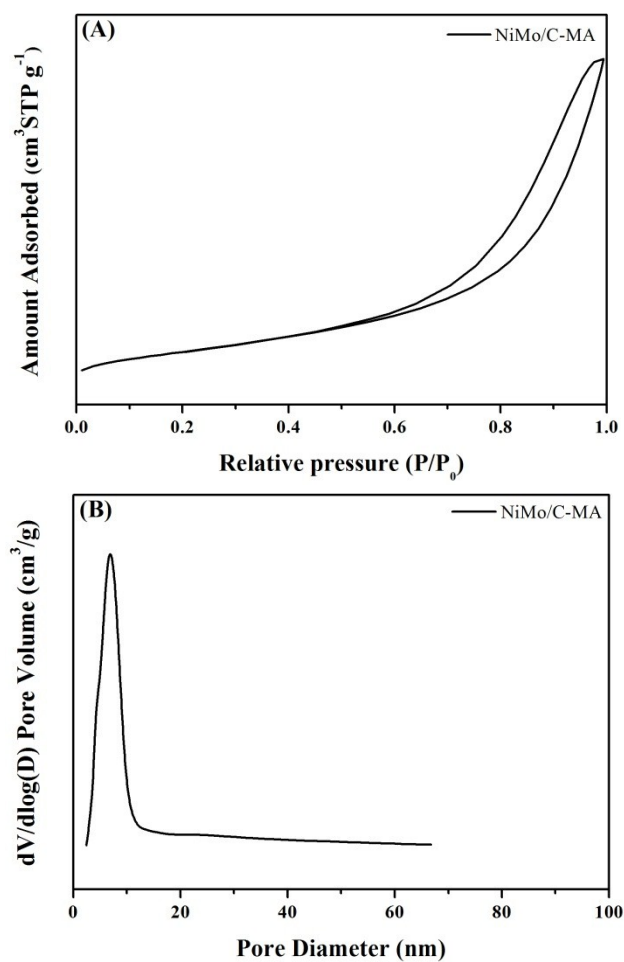

Fig. S4. N<sub>2</sub> adsorption-desorption patterns (A) and pore size distributions (B) of the catalyst NiMo/C-MA.

Table 1. The structure parameters of the catalyst NiMo/ $\gamma$ -C.

| Samples           | $S_{\text{BET}}^{\text{a}}$ ( $\text{m}^2 \cdot \text{g}^{-1}$ ) | $V_{\text{mes}}^{\text{b}}$ ( $\text{cm}^3 \cdot \text{g}^{-1}$ ) | $V_{\text{mic}}^{\text{c}}$ ( $\text{cm}^3 \cdot \text{g}^{-1}$ ) | $d_{\text{BJH}}^{\text{d}}$ (nm) |
|-------------------|------------------------------------------------------------------|-------------------------------------------------------------------|-------------------------------------------------------------------|----------------------------------|
| NiMo/ $\gamma$ -C | 205.05                                                           | 0.36                                                              | 0.009                                                             | 6.31                             |

Note: a: Calculated by BET method.

b: Calculated using BJH method.

c: Calculated using the t-plot method.

d: Mesopore diameter was calculated using BJH method.
